# Supplementary material for: Precise Correction of the Dystrophin Gene in Duchenne Muscular Dystrophy Patient Induced Pluripotent Stem Cells by TALEN and CRISPR-Cas9
Source: PubMed Central journal article supplement (PMC4297888; doi:10.1016/j.stemcr.2014.10.013), 2014-11-26
Supplement: mmc1.pdf [file mmc1.pdf]

Stem Cell Reports, Volume 4

Supplemental Information

# **Precise Correction of the Dystrophin Gene in Duchenne Muscular Dystrophy Patient Induced Pluripotent Stem Cells by TALEN and CRISPR-Cas9**

Hongmei Lisa Li, Naoko Fujimoto, Noriko Sasakawa, Saya Shirai, Tokiko Ohkame,  
Tetsushi Sakuma, Michihiro Tanaka, Naoki Amano, Akira Watanabe, Hidetoshi Sakurai,  
Takashi Yamamoto, Shinya Yamanaka, and Akitsu Hotta

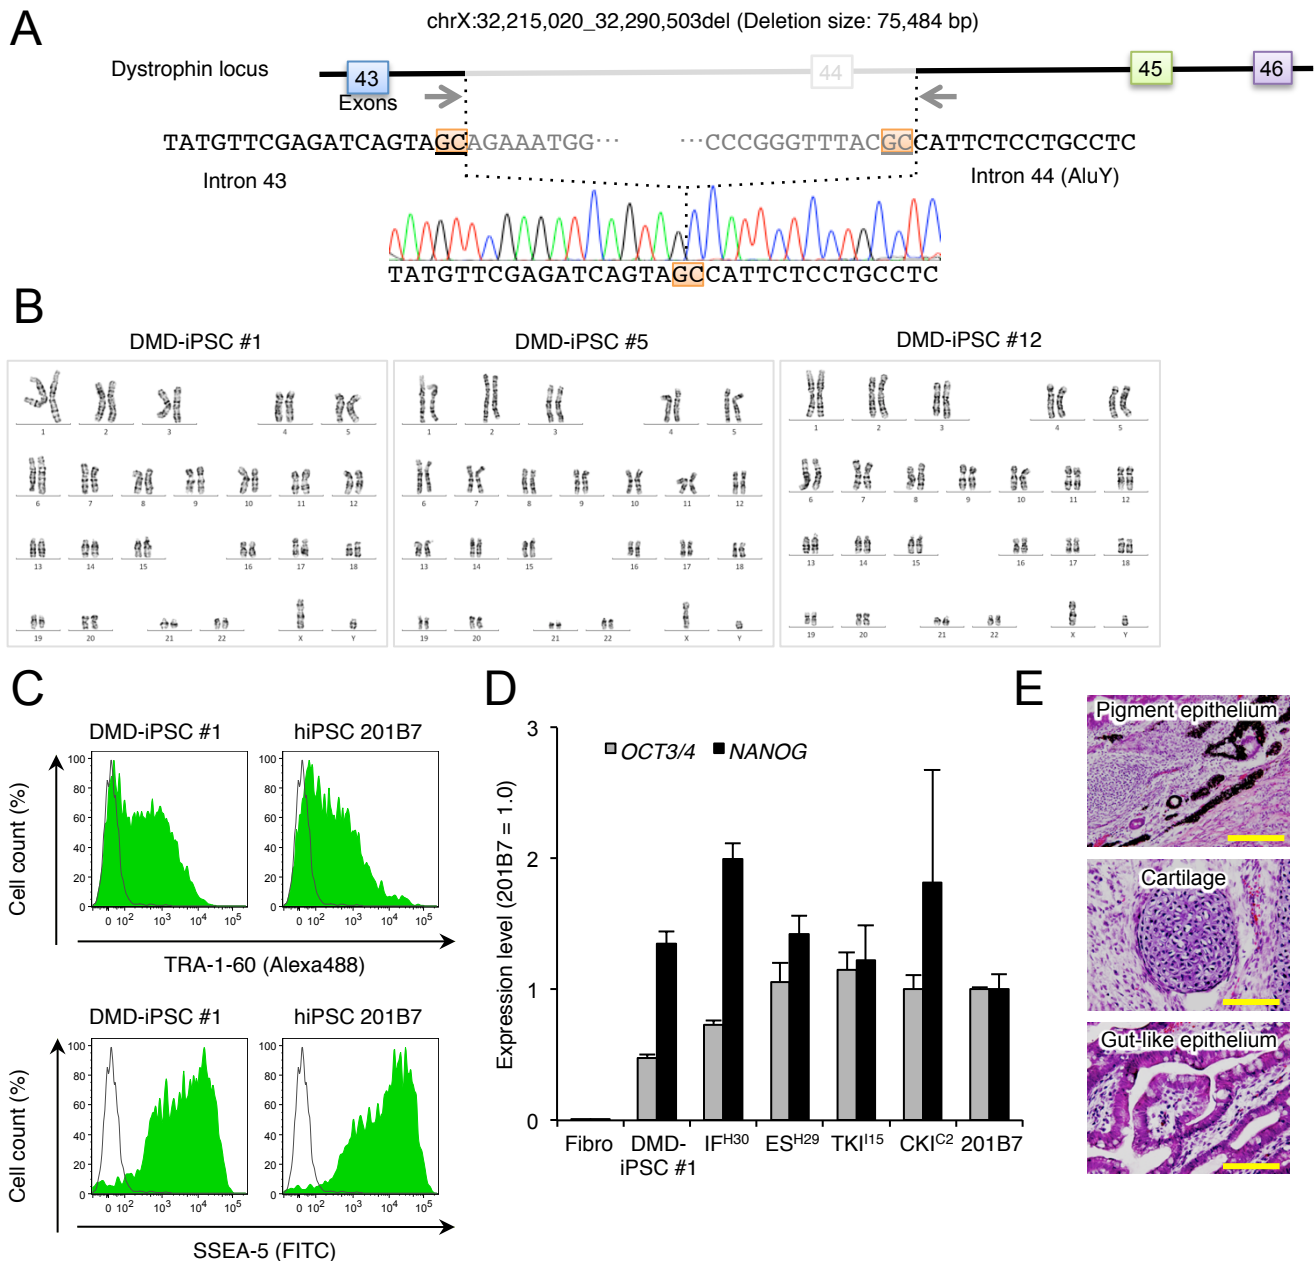

**Figure S1. Establishment of DMD-iPSCs, Related to Figures 2-6.**

(A) Breakpoint analysis of the copy number loss of exon 44 in the dystrophin gene in the genome of a DMD patient who lacked exon 44. Multiple PCRs and Sanger sequences identified the loss of a 75 kbp region including exon 44. The orange box in the lower panel indicates the micro-homology sequence “GC” found at the breakpoint. (B) iPSC cell lines generated by episomal vectors maintained normal karyotypes. (C) Flow cytometry analysis showed that DMD-iPSC clone #1 was positive for pluripotency markers TRA-1-60 and SSEA-5, equivalent to the control hiPSC 201B7 clone. (D) qRT-PCR analysis for *OCT3/4* and *NANOG* in the DMD-iPSC #1 clone and the derivative clones. The data were normalized to those of the control hiPSC line, 201B7. The values represent mean  $\pm$  SD among technical replicates ( $n = 3$ ). (E) A histological examination of a teratoma from DMD-iPSC #1 showed the formation of tissue structures that correspond to the three germ layers: pigmented epithelium (ectoderm), cartilage (mesoderm) and gut-like epithelium (endoderm). Scale bar, 100  $\mu$ m.

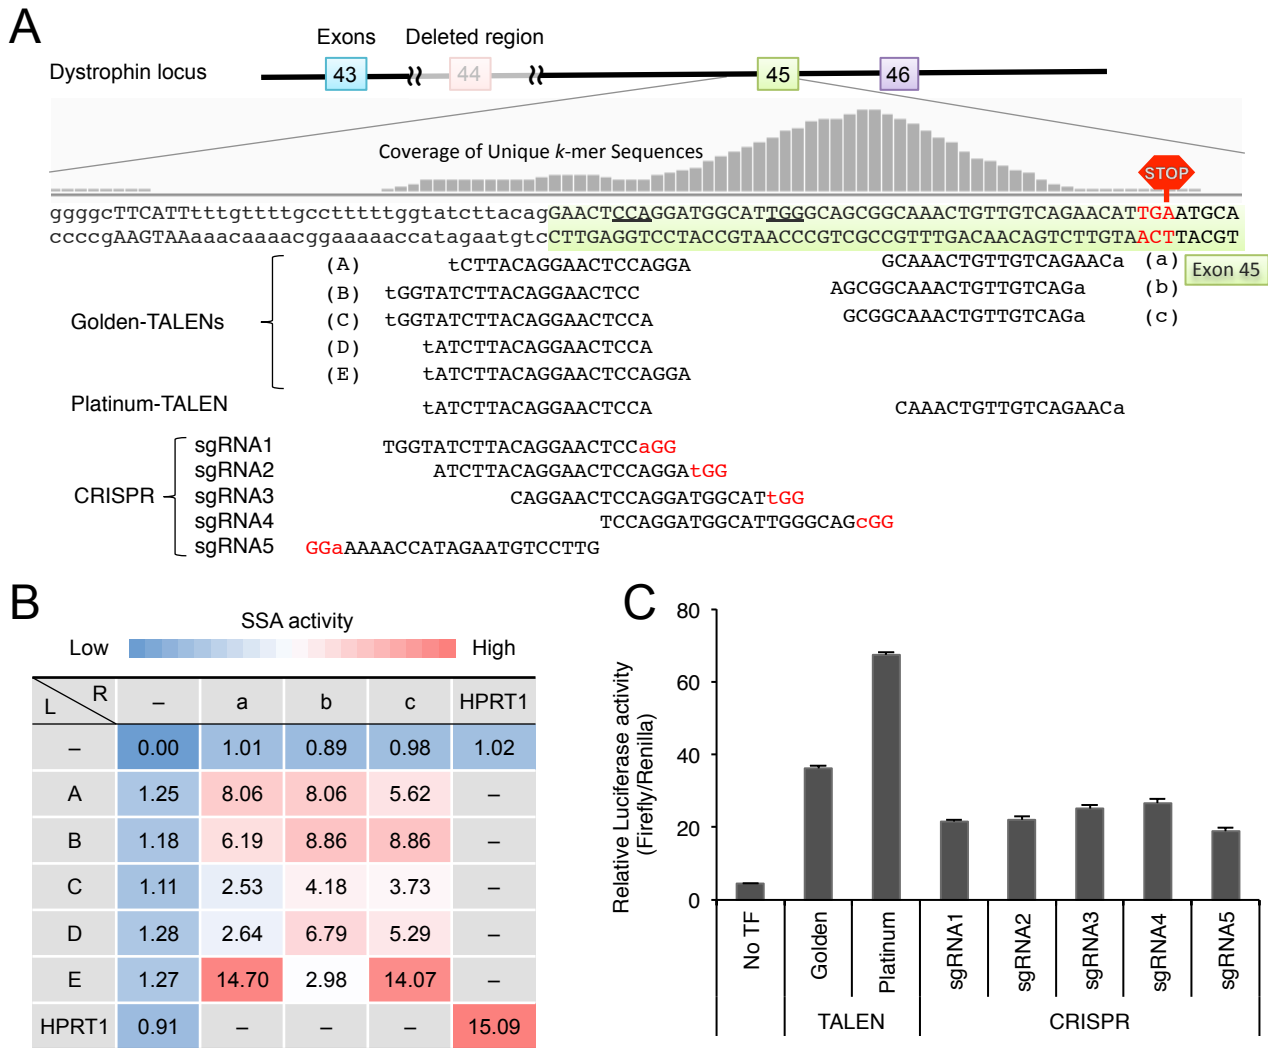

**Figure S2. Screening for the most active TALENs and CRISPR-sgRNAs, Related to Figure 2.**

(A) The target sites of the nucleases used in this study, including TALEN pairs and CRISPR-sgRNAs, at exon 45 of the dystrophin gene. Golden-TALENs were constructed with the Golden-Gate assembly method, and Platinum-TALEN was constructed with the Platinum-Gate assembly method with some non-RVD variation. CRISPR-sgRNA1-4 target the sense strand, whereas sgRNA5 targets the antisense strand. (B) The activities of Golden-TALENs were analyzed by a SSA (single-strand annealing) assay in HEK293T cells ( $n = 3$ ). Left TALENs (A-E) and right TALENs (a-c) were co-transfected with a luciferase-expressing vector, where the luciferase gene was separated from the exon 45 target site. Among the pairs of combinations tested, the E/a and E/c pairs showed highest SSA activity, a result similar to that of the positive control TALEN pair targeting the HPRT1 gene. (C) The SSA activities of CRISPR-sgRNAs in HEK293T cells. Golden-TALEN (E/a pair) and the Platinum-TALEN pair were used as positive controls. Each of the five CRISPR-sgRNAs was transfected with human-codon optimized wild-type Cas9. The values represent mean  $\pm$  SD among technical replicates ( $n = 3$ ).

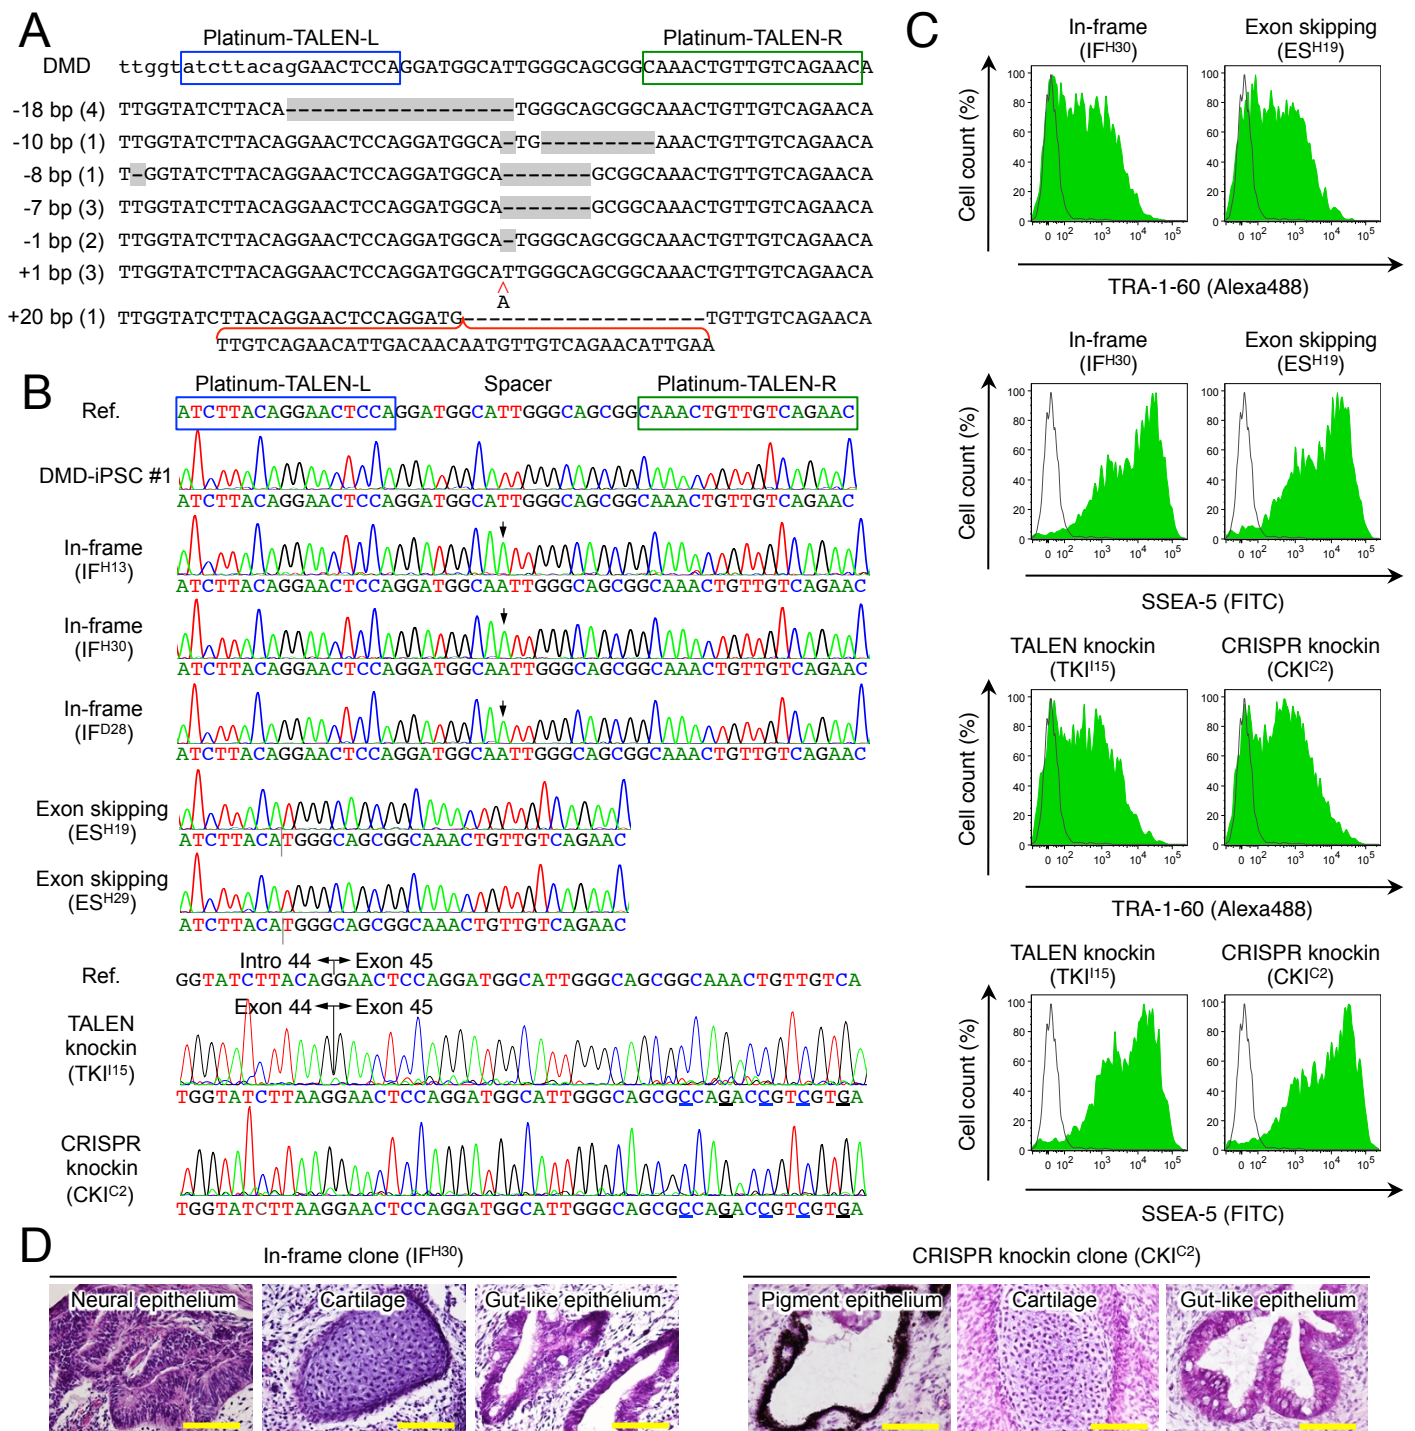

**Figure S3. Confirmation of the corrected DMD-iPS cell clones, Related to Figures 3, 4.**

(A) Indel patterns induced by Platinum-TALEN. The sizes of the indels are shown on the left, and the number of clones for each indel are indicated in parentheses. Clones with a 1 bp insertion are in-frame clones, and those with the 18 bp deletion are exon 45 skipping clones. Other indels did not restore the reading frame. (B) Sanger sequence electrograms confirmed corresponding clones with the 1 bp insertion (IF<sup>H13</sup>, IF<sup>H30</sup> and IF<sup>D28</sup>), exon skipping clones with the 18 bp deletion (ES<sup>H19</sup> and ES<sup>H29</sup>) and knockin clones with the genomic exon 44-45 junction (TKI<sup>I15</sup> and CKI<sup>C2</sup>). The original DMD-iPSC sequence is shown at the top and middle for reference. Black arrow indicates the 1 bp insertion. Underlined sequence in knockin clones indicates 5 silent mutations to prevent the re-cutting. (C) The expression of pluripotency markers, TRA-1-60 and SSEA-5, in the in-frame, exon skipping and exon 44 knockin clones as assessed by flow cytometry. (D) Teratoma assay of the corrected DMD-iPS clones (IF<sup>H30</sup> and CKI<sup>C2</sup>) showed the formation of tissue structures that correspond to the three germ layers. Scale bar, 100  $\mu$ m.

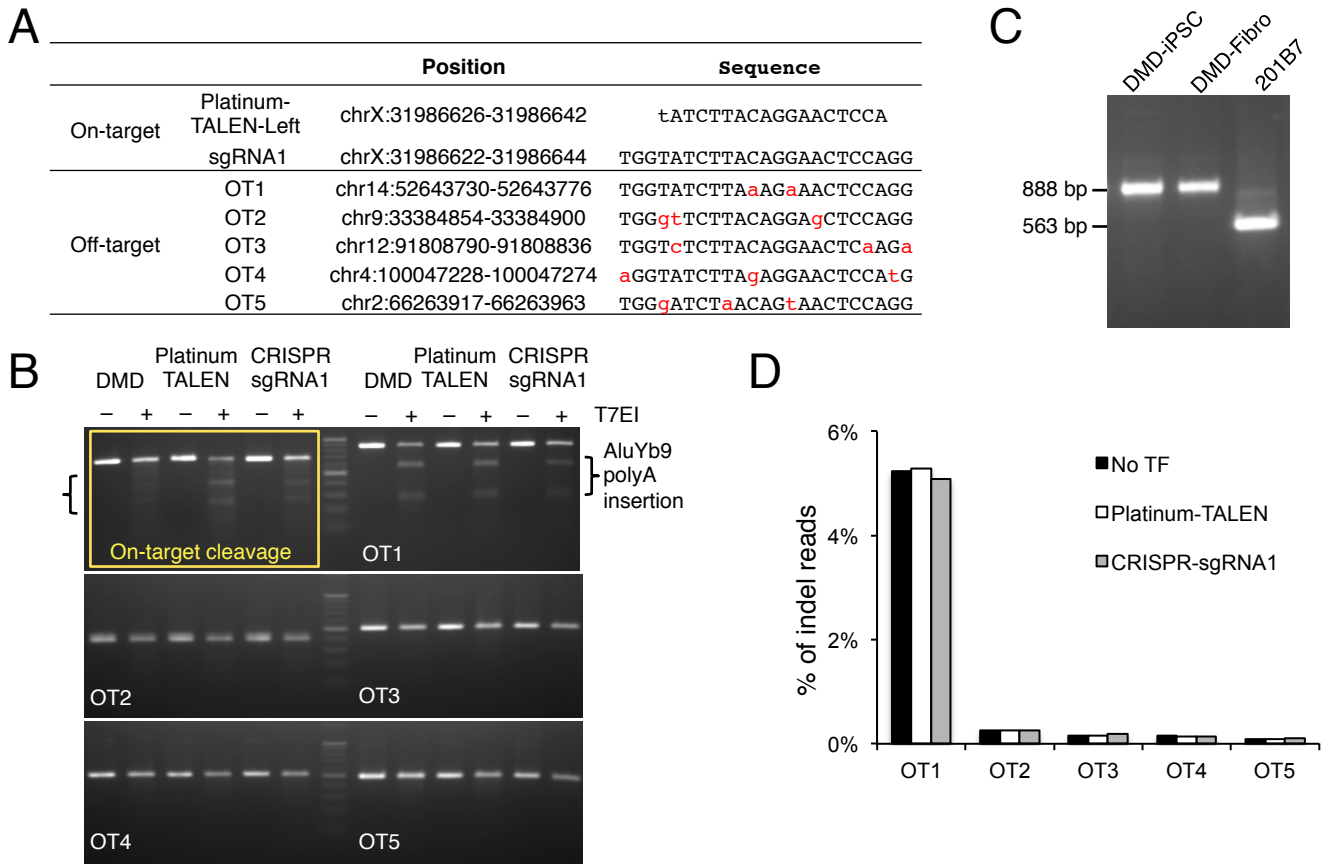

**Figure S4. No severe mutagenesis observed at the predicted off-target sites, Related to Figure 5.**

(A) The predicted off-target (OT) sites allowed up to three mismatches for CRISPR-sgRNA1. Red characters indicate mismatches compared to on-target sgRNA1. (B) The predicted off-target loci were amplified by PCR and analyzed by a T7EI assay. The yellow box shows successful detection of the on-target mutagenesis by our T7EI assay. OT2-5 sites showed no cleavage at the off-target sites except for OT1. Because the PCR amplicon size for OT1 was larger than expected and because we observed cleaved bands even in the control (No TF), we sequenced the OT1 PCR fragment and found the homozygous insertion of AluYb9 in the middle of the OT1 site. (C) Genomic PCR analysis confirmed the insertion of the AluYb9 at OT1 in original fibroblasts derived from the DMD patient, but not in a control human iPSC clone (201B7). (D) Indel mutations at the off-target sites were assessed by amplicon deep sequencing. The OT1 site suffered from a high indel ratio due to the poly A region of the AluYb9 element. No TF: no transfection DMD-iPSCs.

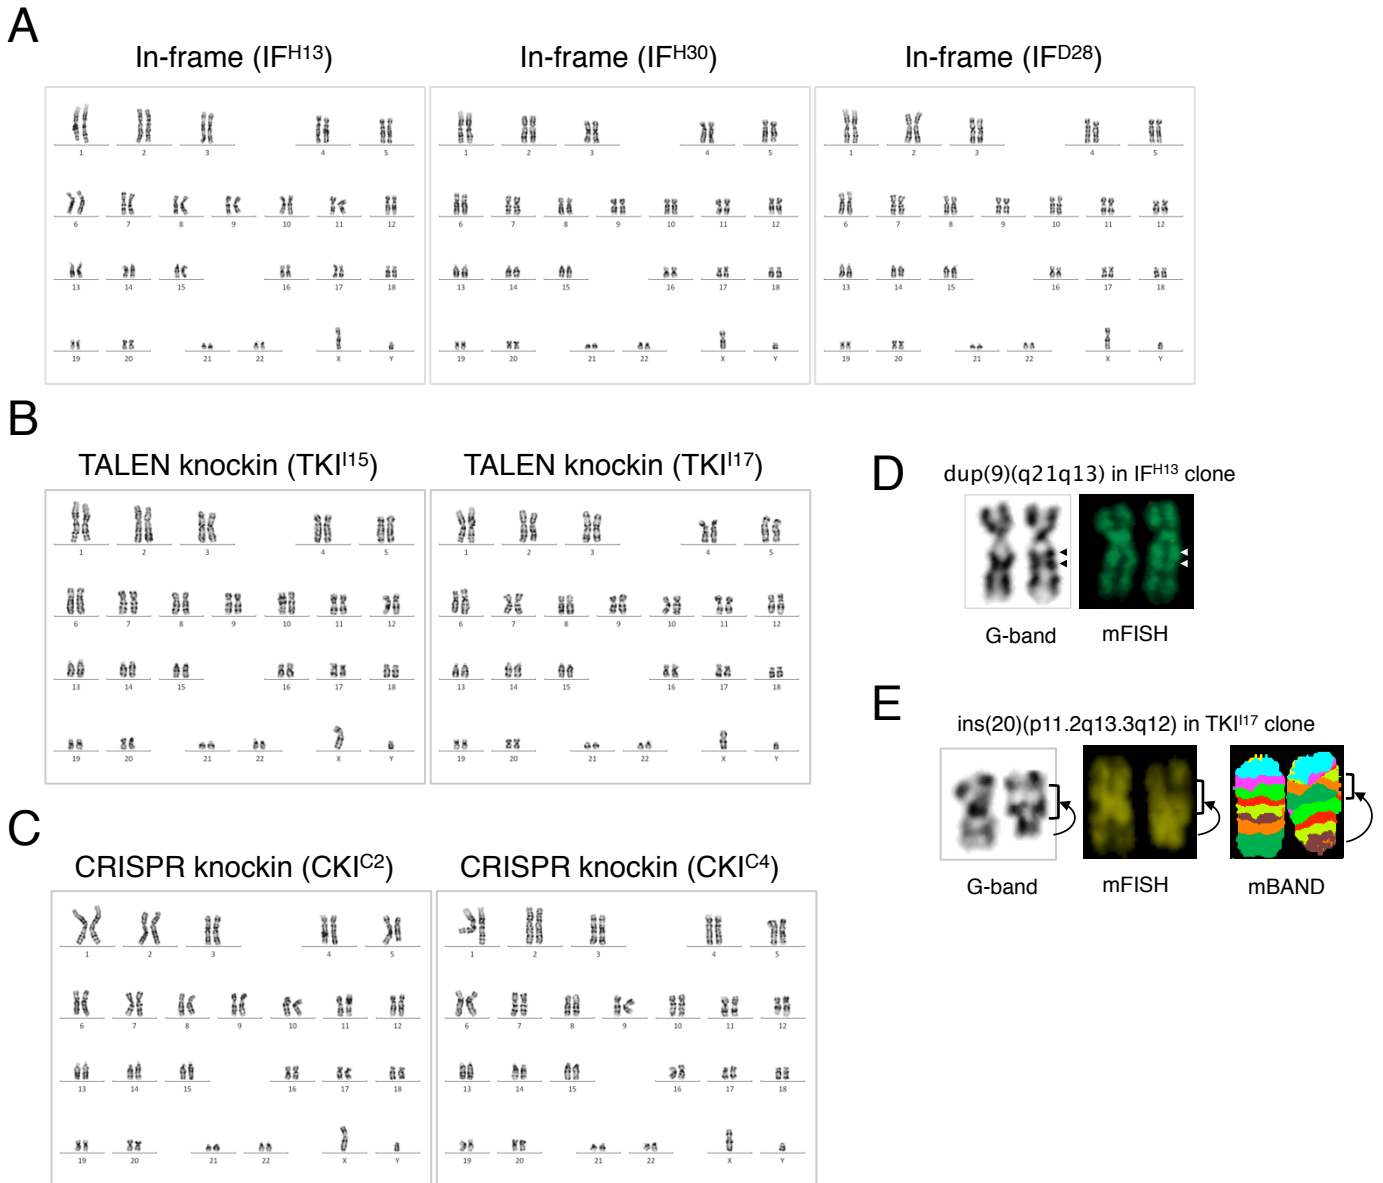

**Figure S5. Karyotyping analysis of the corrected clones, Related to Figure 5A.**

(A) (B) and (C) High-resolution G-banding analysis revealed that most cells showed a normal karyotype with corrected clones, in-frame clones (IF<sup>H13</sup>, IF<sup>H30</sup> and IF<sup>D28</sup>) (A), TALEN-mediated knockin clones (TKI<sup>I15</sup> and TKI<sup>I17</sup>) (B) and CRISPR-mediated knockin clones (CKI<sup>C2</sup> and CKI<sup>C4</sup>) (C). (D) G-banding and mFISH images showed suspected duplication (two arrowheads) at chromosome 9 in the IF<sup>H13</sup> clone (5 metaphases per 23 examined). (E) mFISH and mBAND showed an inverted insertion of chromosome 20 (ins(20)(p11.2q13.3q12)) in TALEN-mediated knockin clone TKI<sup>I17</sup>.

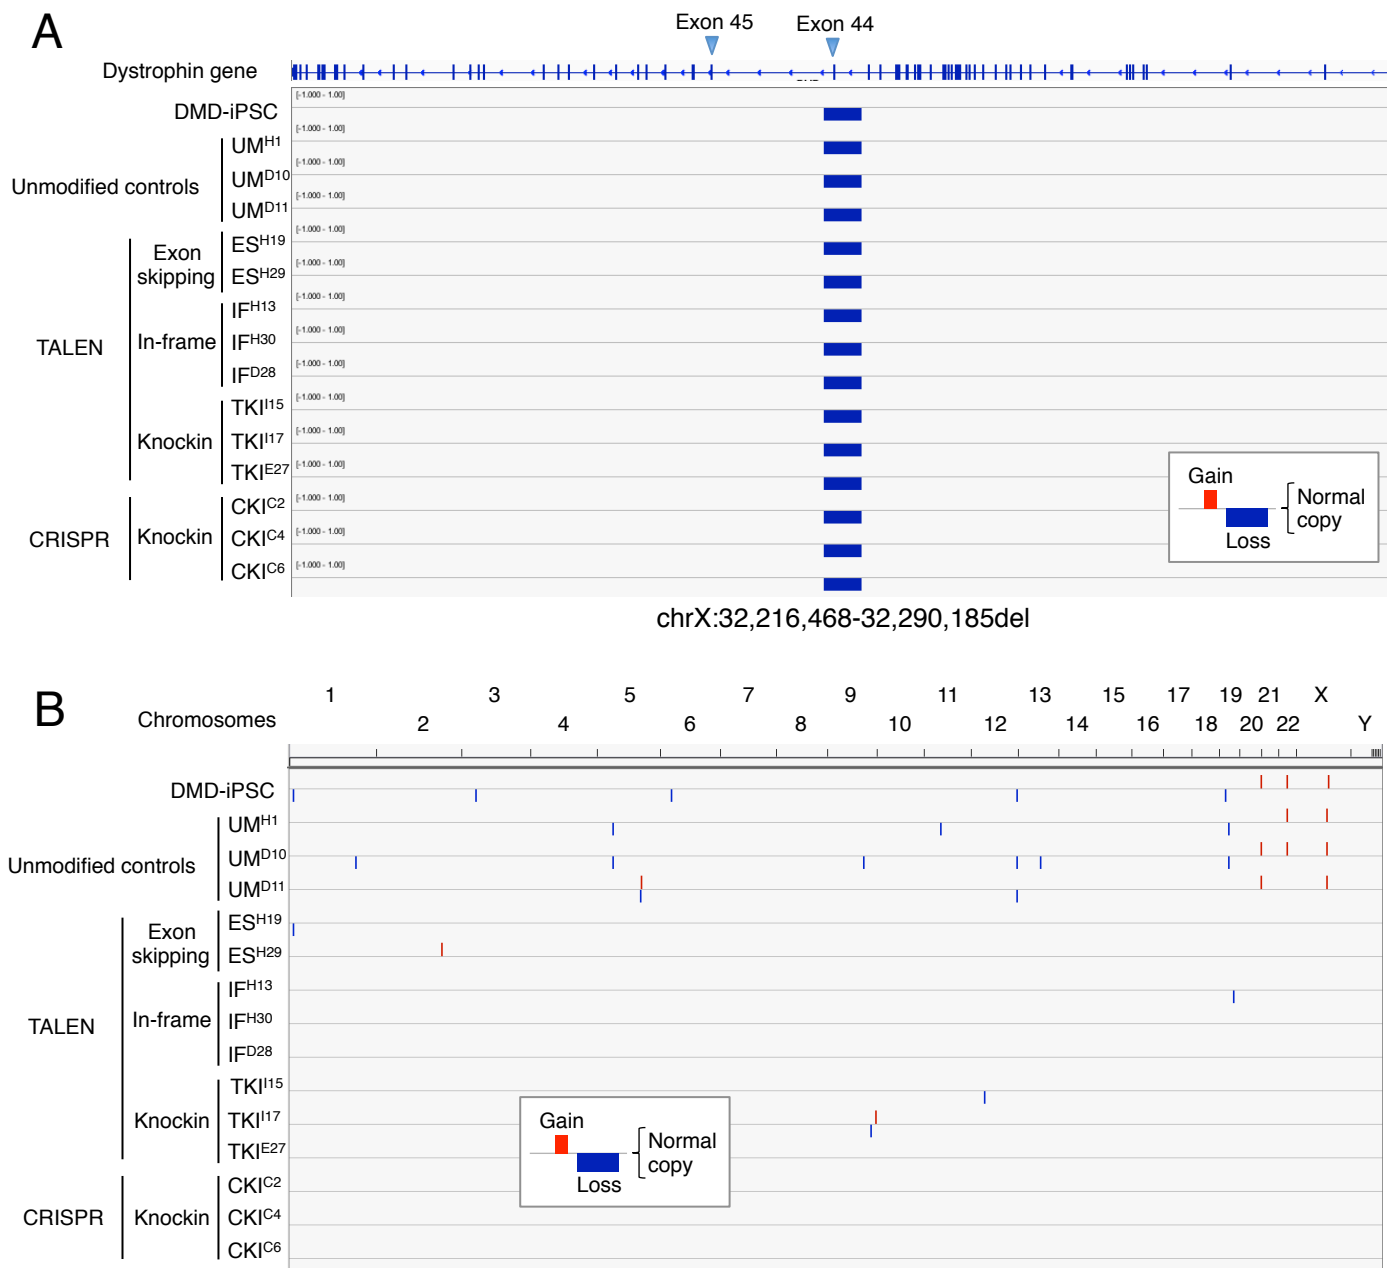

**Figure S6. Detection of CNVs in the dystrophin gene and in the corrected clones, Related to Figure 5B.**

(A) The copy numbers detected by the SNP array and PennCNV are plotted. The grey horizontal axis indicates normal copies (i.e. two copies for autosomal chromosomes and one copy for X and Y chromosomes). The blue bar under the grey axis indicates the copy number loss at the exon 44 region in the dystrophin gene. We successfully identified the deletion of chrX:32,216,468-32,290,185 in all DMD samples, which is in close agreement with break point analysis (chrX:32,215,020-32,290,503del), as shown in Supplementary Fig. 1a. (B) De novo CNVs found in genetically modified clones. Red bars above the grey axis indicate copy number gain, and blue bars below the grey axis indicate copy number loss.

**Table S1. Summary of unique *k*-mers to identify unique regions in the genome, Related to Figure 1.**

| <b>Length</b> |          | <b>Total No. of <i>k</i>-mers</b> | <b>No. of unique <i>k</i>-mers</b> | <b>Coverage of the human genome</b> |
|---------------|----------|-----------------------------------|------------------------------------|-------------------------------------|
| 16-mer        | $4^{16}$ | 4,294,967,296                     | 980,117,801                        | 62.60%                              |
| 15-mer        | $4^{15}$ | 1,073,741,824                     | 263,051,237                        | 27.60%                              |
| 14-mer        | $4^{14}$ | 268,435,456                       | 55,041,124                         | 7.29%                               |
| 13-mer        | $4^{13}$ | 67,108,864                        | 5,842,203                          | 1.13%                               |
| 12-mer        | $4^{12}$ | 16,777,216                        | 324,003                            | 0.08%                               |
| 11-mer        | $4^{11}$ | 4,194,304                         | 3,097                              | $9.61 \times 10^{-4} \%$            |
| 10-mer        | $4^{10}$ | 1,048,576                         | 1                                  | $2.82 \times 10^{-7} \%$            |



**Table S2. Examples of the microhomology-mediated deletion patterns, Related to Figure 3.**

| Nucleases      | Target sequences                                                             | Microhomology motif | Deletion size (bp) |
|----------------|------------------------------------------------------------------------------|---------------------|--------------------|
| Golden-TALEN   | <u>TTTTGCCTTTTGGTATCTTACAGGA</u> ACTCCAGGATGGCATTGGCAAGCGGCAAACTGTTGTCAGAAC  | GGCA                | Δ 6                |
|                | <u>TTTTGCCTTTTGGTATCTTACAGGA</u> ACTCCAGGATGGCAATGGGCAAGCGGCAAACTGTTGTCAGAAC | GGCA                | Δ 7                |
|                | <u>TTTTGCCTTTTGGTATCTTACAGGA</u> ACTCCAGGATGGCAATGGGCAGCGGCAAACTGTTGTCAGAAC  | GGCA                | Δ 13               |
|                | <u>TTTTGCCTTTTGGTATCTTACAGGA</u> ACTCCAGGATGGCATGGGCAGCGGCAAACTGTTGTCAGAAC   | TGG                 | Δ 6                |
|                | <u>TTTTGCCTTTTGGTATCTTACAGGA</u> ACTCCAGGATGGCATTGGGCAGCGGCAAACTGTTGTCAGAAC  | CAG                 | Δ 15               |
|                | <u>TTTTGCCTTTTGGTATCTTACAGGA</u> ACTCCAGGATGGCATGGGCAGCGGCAAACTGTTGTCAGAAC   | TTG                 | Δ 18               |
| Platinum-TALEN | <u>TTTTGCCTTTTGGTATCTTACAGGA</u> ACTCCAGGATGGCATTGGCAAGCGGCAAACTGTTGTCAGAAC  | GGCA                | Δ 6                |
|                | <u>TTTTGCCTTTTGGTATCTTACAGGA</u> ACTCCAGGATGGCAATGGGCAAGCGGCAAACTGTTGTCAGAAC | GGCA                | Δ 7                |
|                | <u>TTTTGCCTTTTGGTATCTTACAGGA</u> ACTCCAGGATGGCAATGGGCAGCGGCAAACTGTTGTCAGAAC  | GGCA                | Δ 13               |
|                | <u>TTTTGCCTTTTGGTATCTTACAGGA</u> ACTCCAGGATGGCATGGGCAGCGGCAAACTGTTGTCAGAAC   | TGG                 | Δ 6                |
|                | <u>TTTTGCCTTTTGGTATCTTACAGGA</u> ACTCCAGGATGGCATTGGGCAGCGGCAAACTGTTGTCAGAAC  | CAG                 | Δ 15               |
|                | <u>TTTTGCCTTTTGGTATCTTACAGGA</u> ACTCCAGGATGGCATGGGCAGCGGCAAACTGTTGTCAGAAC   | TTG                 | Δ 18               |
| CRISPR-sgRNA1  | <u>TTTTGCCTTTTGGTATCTTACAGGA</u> ACTCCAGGATGGCATTGGGCAGCGGCAAACTGTTGTCAGAAC  | CAGGA               | Δ 9                |
| CRISPR-sgRNA2  | <u>TTTTGCCTTTTGGTATCTTACAGGA</u> ACTCCAGGATGGCATTGGGCAGCGGCAAACTGTTGTCAGAAC  | CAGGA               | Δ 9                |
| CRISPR-sgRNA3  | <u>TTTTGCCTTTTGGTATCTTACAGGA</u> ACTCCAGGATGGCATGGGCAAGCGGCAAACTGTTGTCAGAAC  | GGCA                | Δ 6                |
|                | <u>TTTTGCCTTTTGGTATCTTACAGGA</u> ACTCCAGGATGGCATGGGCAGCGGCAAACTGTTGTCAGAAC   | TGG                 | Δ 6                |
|                | <u>TTTTGCCTTTTGGTATCTTACAGGA</u> ACTCCAGGATGGCATGGGCAGCGGCAAACTGTTGTCAGAAC   | CAG                 | Δ 15               |
| CRISPR-sgRNA4  | <u>TTTTGCCTTTTGGTATCTTACAGGA</u> ACTCCAGGATGGCATTGGGCAAGCGGCAAACTGTTGTCAGAAC | GGCA                | Δ 6                |
|                | <u>TTTTGCCTTTTGGTATCTTACAGGA</u> ACTCCAGGATGGCATTGGGCAAGCGGCAAACTGTTGTCAGAAC | GGCA                | Δ 7                |
|                | <u>TTTTGCCTTTTGGTATCTTACAGGA</u> ACTCCAGGATGGCATTGGGCAAGCGGCAAACTGTTGTCAGAAC | GGCA                | Δ 13               |
| CRISPR-sgRNA5  | <u>TTTTGCCTTTTGGTATCTTACAGGA</u> ACTCCAGGATGGCATTGGGCAGCGGCAAACTGTTGTCAGAAC  | TTTTG               | Δ 8                |
|                | <u>TTTTGCCTTTTGGTATCTTACAGGA</u> ACTCCAGGATGGCATTGGGCAGCGGCAAACTGTTGTCAGAAC  | CTT                 | Δ 11               |

Red characters: microhomology sequences with more than 3 bp that flank the cleavage site of TALENs or CRISPRs.  
 Underline: the recognition site for TALEN pairs or CRISPR-sgRNAs  
 v: the cleavage sites of CRISPR-Cas9.

**Table S3. Summary of capture statistics for the exome sequencing, Related to Figure 5C.**

| Category            | Sample ID         | Total Reads        | Remove identical reads* | Unique %    | Mapped reads <sup>†</sup> | Mapping %   |       |
|---------------------|-------------------|--------------------|-------------------------|-------------|---------------------------|-------------|-------|
| Original fibroblast | DMD_fibroblast    | 129,536,708        | 88,652,535              | 68%         | 86,671,306                | 97.8%       |       |
| Original iPSC clone | DMD-iPSC          | 130,243,436        | 106,064,367             | 81%         | 104,115,285               | 98.2%       |       |
| Unmodified controls | UM <sup>D10</sup> | 134,171,856        | 90,013,937              | 67%         | 87,747,006                | 97.5%       |       |
|                     | UM <sup>D11</sup> | 138,880,388        | 114,021,013             | 82%         | 112,671,565               | 98.8%       |       |
|                     | UM <sup>H1</sup>  | 126,398,760        | 109,834,280             | 87%         | 107,919,254               | 98.3%       |       |
| TALEN               | Exon skipping     | ES <sup>H19</sup>  | 136,945,384             | 104,830,953 | 77%                       | 102,317,225 | 97.6% |
|                     |                   | ES <sup>H29</sup>  | 122,965,492             | 107,018,775 | 87%                       | 104,802,925 | 97.9% |
|                     | In-frame          | IF <sup>H13</sup>  | 119,170,318             | 94,297,902  | 79%                       | 92,796,375  | 98.4% |
|                     |                   | IF <sup>H30</sup>  | 138,612,424             | 109,896,988 | 79%                       | 108,131,267 | 98.4% |
|                     |                   | IF <sup>D28</sup>  | 131,120,892             | 108,044,479 | 82%                       | 106,164,805 | 98.3% |
|                     | Knockin           | TKI <sup>I15</sup> | 95,030,774              | 80,900,233  | 85%                       | 79,835,405  | 98.7% |
| TKI <sup>I17</sup>  |                   | 97,704,786         | 82,501,149              | 84%         | 81,278,499                | 98.5%       |       |
| TKI <sup>E27</sup>  |                   | 92,361,384         | 78,223,262              | 85%         | 77,118,236                | 98.6%       |       |
| CRISPR              | Knockin           | CKI <sup>C2</sup>  | 119,453,700             | 107,111,909 | 90%                       | 105,433,227 | 98.4% |
|                     |                   | CKI <sup>C4</sup>  | 130,291,792             | 113,680,521 | 87%                       | 112,100,032 | 98.6% |
|                     |                   | CKI <sup>C6</sup>  | 125,818,120             | 111,141,505 | 88%                       | 109,767,667 | 98.8% |

\* Duplicated identical reads were deemed as PCR artifact during the sample preparation of the sequencing.

<sup>†</sup> Mapped to human genome (hg19)

**Table S4. SNVs detected by the exome sequencing, Related to Figure 5C.**

| UM <sup>H1</sup> | UM <sup>D10</sup> | UM <sup>D11</sup> | ES <sup>H19</sup> | ES <sup>H29</sup> | IF <sup>H13</sup> | IF <sup>H30</sup> | IF <sup>D28</sup> | TKI <sup>I15</sup> | TKI <sup>I17</sup> | TKI <sup>E27</sup> | CKI <sup>C2</sup> | CKI <sup>C4</sup> | CKI <sup>C6</sup> | chr   | Position  | Gene          | ExonicFunc        | ref | alt |
|------------------|-------------------|-------------------|-------------------|-------------------|-------------------|-------------------|-------------------|--------------------|--------------------|--------------------|-------------------|-------------------|-------------------|-------|-----------|---------------|-------------------|-----|-----|
|                  |                   |                   |                   |                   |                   |                   |                   |                    | SNV                |                    |                   |                   |                   | chr1  | 10725468  | CASZ1         | synonymous SNV    | C   | T   |
| SNV              |                   |                   |                   |                   |                   |                   |                   |                    | SNV                |                    |                   |                   |                   | chr1  | 26671594  | AIM1L         | nonsynonymous SNV | T   | C   |
| SNV              |                   |                   |                   |                   |                   |                   |                   |                    | SNV                |                    |                   |                   |                   | chr1  | 26671595  | AIM1L         | synonymous SNV    | G   | A   |
| SNV              |                   |                   |                   |                   |                   |                   | SNV               |                    |                    |                    |                   |                   |                   | chr1  | 47685584  | TAL1          | synonymous SNV    | T   | C   |
|                  |                   | SNV               |                   |                   |                   |                   |                   |                    |                    |                    |                   |                   |                   | chr1  | 47685593  | TAL1          | synonymous SNV    | A   | C   |
|                  |                   |                   |                   |                   |                   |                   |                   | SNV                |                    |                    |                   |                   |                   | chr1  | 152084216 | TCHH          | nonsynonymous SNV | C   | G   |
|                  |                   |                   |                   |                   | SNV               |                   |                   |                    |                    |                    |                   |                   |                   | chr1  | 152084437 | TCHH          | nonsynonymous SNV | A   | T   |
|                  |                   |                   |                   |                   | SNV               |                   |                   |                    |                    |                    |                   |                   |                   | chr1  | 152084438 | TCHH          | nonsynonymous SNV | G   | C   |
|                  |                   |                   |                   |                   |                   | SNV               |                   |                    | SNV                |                    |                   |                   |                   | chr1  | 152681689 | LCE4A         | synonymous SNV    | G   | C   |
|                  |                   |                   |                   |                   |                   |                   |                   |                    |                    |                    | SNV               |                   |                   | chr1  | 228335240 | GUK1          | nonsynonymous SNV | G   | A   |
|                  |                   |                   |                   |                   | SNV               | SNV               |                   |                    |                    |                    |                   |                   |                   | chr2  | 31457663  | EHD3          | nonsynonymous SNV | C   | T   |
|                  |                   |                   |                   |                   |                   |                   |                   | SNV                |                    |                    |                   |                   |                   | chr2  | 204306002 | RAPH1         | synonymous SNV    | A   | G   |
|                  |                   |                   |                   |                   |                   |                   |                   | SNV                |                    |                    |                   |                   |                   | chr2  | 204306008 | RAPH1         | synonymous SNV    | A   | G   |
|                  |                   |                   |                   |                   |                   |                   |                   | SNV                | SNV                |                    |                   |                   |                   | chr3  | 45801382  | SLC6A20       | synonymous SNV    | C   | T   |
|                  | SNV               |                   |                   |                   |                   |                   |                   |                    |                    |                    |                   |                   |                   | chr3  | 75786748  | ZNF717        | nonsynonymous SNV | C   | T   |
|                  | SNV               |                   |                   |                   |                   |                   |                   |                    |                    |                    |                   |                   |                   | chr3  | 167217960 | WDR49         | synonymous SNV    | C   | T   |
|                  | SNV               |                   |                   |                   |                   |                   |                   |                    |                    |                    |                   |                   |                   | chr3  | 167217964 | WDR49         | nonsynonymous SNV | A   | G   |
|                  |                   |                   |                   | SNV               |                   |                   |                   |                    |                    |                    |                   |                   |                   | chr3  | 195506245 | MUC4          | nonsynonymous SNV | C   | A   |
|                  |                   |                   |                   | SNV               |                   |                   |                   |                    |                    |                    |                   |                   |                   | chr3  | 195506645 | MUC4          | nonsynonymous SNV | G   | A   |
|                  |                   |                   |                   |                   |                   |                   |                   |                    |                    |                    | SNV               |                   |                   | chr3  | 195515290 | MUC4          | nonsynonymous SNV | C   | G   |
| SNV              |                   |                   |                   |                   |                   |                   |                   |                    |                    |                    |                   |                   |                   | chr3  | 197500320 | FYTTD1        | nonsynonymous SNV | C   | A   |
|                  |                   |                   |                   |                   |                   |                   |                   |                    |                    |                    | SNV               |                   |                   | chr4  | 88537180  | DSPP          | synonymous SNV    | T   | C   |
|                  |                   |                   |                   |                   |                   |                   |                   |                    |                    | SNV                |                   |                   |                   | chr5  | 140531592 | PCDHB6        | nonsynonymous SNV | C   | T   |
|                  |                   |                   |                   |                   |                   |                   |                   |                    | SNV                |                    |                   |                   |                   | chr5  | 141974916 | FGF1          | nonsynonymous SNV | G   | T   |
|                  |                   |                   |                   |                   |                   |                   |                   |                    | SNV                |                    |                   |                   |                   | chr6  | 16327915  | ATXN1         | nonsynonymous SNV | A   | C   |
|                  |                   |                   |                   |                   |                   |                   |                   |                    |                    |                    | SNV               | SNV               |                   | chr6  | 25850031  | SLC17A3       | NA                | A   | G   |
| SNV              |                   |                   |                   | SNV               | SNV               |                   |                   |                    | SNV                |                    |                   |                   | SNV               | chr6  | 57393112  | PRIM2         | NA                | T   | C   |
|                  | SNV               |                   |                   |                   |                   |                   |                   |                    |                    |                    |                   |                   |                   | chr6  | 57398264  | PRIM2         | synonymous SNV    | A   | G   |
|                  |                   |                   |                   |                   |                   |                   |                   |                    |                    |                    |                   |                   | SNV               | chr7  | 5413826   | TNRC18        | nonsynonymous SNV | T   | G   |
|                  |                   |                   |                   |                   |                   |                   |                   |                    |                    | SNV                |                   |                   |                   | chr7  | 56087399  | PSPH          | nonsynonymous SNV | G   | A   |
|                  | SNV               |                   |                   |                   |                   |                   |                   |                    |                    |                    |                   |                   |                   | chr7  | 89937168  | C7orf63       | synonymous SNV    | G   | A   |
|                  |                   |                   |                   |                   |                   |                   |                   |                    |                    | SNV                |                   |                   |                   | chr7  | 100639153 | MUC12         | nonsynonymous SNV | C   | T   |
|                  |                   |                   |                   |                   |                   |                   |                   |                    | SNV                |                    |                   |                   |                   | chr8  | 101718965 | PABPC1        | nonsynonymous SNV | G   | A   |
|                  |                   |                   |                   |                   |                   |                   |                   |                    | SNV                |                    |                   |                   |                   | chr8  | 101718968 | PABPC1        | nonsynonymous SNV | C   | T   |
|                  |                   |                   |                   |                   |                   |                   |                   |                    |                    |                    | SNV               |                   |                   | chr8  | 101719004 | PABPC1        | nonsynonymous SNV | G   | A   |
|                  |                   |                   |                   |                   | SNV               |                   |                   |                    |                    |                    |                   |                   |                   | chr8  | 133051259 | OC90          | nonsynonymous SNV | C   | A   |
|                  |                   |                   |                   |                   |                   | SNV               |                   |                    |                    |                    |                   |                   |                   | chr8  | 144995598 | PLEC          | synonymous SNV    | G   | A   |
|                  |                   |                   |                   |                   |                   |                   |                   | SNV                |                    |                    |                   |                   |                   | chr9  | 35906583  | HRCT1         | nonsynonymous SNV | T   | A   |
|                  |                   |                   |                   |                   |                   |                   |                   |                    | SNV                |                    |                   |                   |                   | chr9  | 124914613 | NDUFA8        | synonymous SNV    | C   | T   |
|                  |                   |                   |                   |                   |                   |                   |                   |                    | SNV                |                    |                   |                   |                   | chr9  | 125143792 | PTGS1         | synonymous SNV    | C   | A   |
|                  |                   |                   |                   |                   | SNV               | SNV               |                   |                    |                    |                    |                   |                   |                   | chr9  | 129455586 | LMX1B         | nonsynonymous SNV | C   | T   |
|                  |                   |                   |                   |                   |                   |                   |                   | SNV                |                    | SNV                |                   |                   |                   | chr11 | 1090928   | MUC2          | nonsynonymous SNV | A   | C   |
|                  |                   |                   |                   |                   |                   |                   |                   |                    |                    |                    | SNV               | SNV               | SNV               | chr11 | 62652670  | SLC3A2        | synonymous SNV    | C   | T   |
| SNV              |                   |                   |                   |                   |                   |                   |                   |                    |                    |                    |                   |                   |                   | chr12 | 4737745   | AKAP3         | nonsynonymous SNV | C   | A   |
|                  |                   |                   |                   |                   | SNV               | SNV               |                   |                    |                    |                    |                   |                   |                   | chr12 | 120117794 | PRKAB1        | synonymous SNV    | G   | A   |
| SNV              |                   |                   |                   |                   |                   |                   |                   |                    |                    |                    |                   |                   |                   | chr12 | 122255756 | SETD1B        | nonsynonymous SNV | G   | C   |
| SNV              |                   |                   |                   |                   |                   |                   |                   |                    |                    |                    |                   |                   |                   | chr12 | 130921739 | RIMBP2        | nonsynonymous SNV | G   | A   |
| SNV              |                   |                   |                   |                   |                   |                   |                   |                    |                    |                    |                   |                   |                   | chr13 | 20797129  | GJB6          | nonsynonymous SNV | G   | A   |
|                  |                   |                   |                   |                   |                   |                   |                   | SNV                |                    |                    |                   |                   |                   | chr13 | 70924501  | ADAM21        | nonsynonymous SNV | C   | G   |
|                  |                   |                   |                   |                   |                   |                   |                   |                    | SNV                |                    |                   |                   |                   | chr14 | 104145852 | KLC1          | synonymous SNV    | G   | A   |
|                  |                   |                   |                   |                   |                   |                   |                   |                    | SNV                | SNV                |                   |                   |                   | chr15 | 43700161  | TP53BP1       | nonsynonymous SNV | T   | C   |
|                  |                   |                   |                   |                   |                   |                   |                   |                    |                    |                    |                   |                   |                   | chr15 | 65678318  | IGDCC4        | nonsynonymous SNV | T   | G   |
|                  |                   |                   |                   |                   | SNV               |                   |                   |                    |                    |                    |                   |                   |                   | chr16 | 1307050   | TPSD1         | synonymous SNV    | C   | T   |
|                  |                   |                   |                   |                   | SNV               |                   |                   |                    |                    |                    |                   |                   |                   | chr16 | 1307060   | TPSD1         | nonsynonymous SNV | A   | G   |
|                  |                   |                   |                   |                   |                   |                   |                   |                    |                    |                    |                   |                   | SNV               | chr16 | 3026805   | PKMYT1        | nonsynonymous SNV | G   | A   |
|                  |                   |                   |                   |                   |                   |                   |                   |                    |                    |                    |                   |                   |                   | chr16 | 66788886  | CCDC79        | nonsynonymous SNV | G   | T   |
|                  |                   |                   |                   |                   |                   |                   |                   |                    | SNV                | SNV                |                   |                   |                   | chr17 | 3638150   | ITGAE         | nonsynonymous SNV | C   | A   |
|                  |                   |                   |                   |                   | SNV               | SNV               |                   |                    |                    |                    |                   |                   |                   | chr17 | 9503461   | WDR16         | synonymous SNV    | G   | T   |
|                  |                   |                   |                   |                   |                   |                   |                   |                    | SNV                |                    |                   |                   |                   | chr17 | 21318698  | KCNJ12,KCNJ18 | nonsynonymous SNV | C   | T   |
|                  |                   |                   |                   |                   |                   |                   |                   |                    |                    |                    | SNV               | SNV               | SNV               | chr17 | 66036857  | KPNA2         | nonsynonymous SNV | C   | A   |
|                  |                   |                   |                   |                   |                   |                   |                   |                    |                    | SNV                |                   |                   |                   | chr19 | 1430261   | DAZAP1        | synonymous SNV    | G   | C   |
|                  |                   |                   |                   |                   | SNV               |                   |                   |                    |                    |                    |                   |                   |                   | chr19 | 5789565   | DUS3L         | nonsynonymous SNV | T   | C   |
|                  |                   |                   |                   |                   |                   |                   |                   |                    |                    |                    |                   |                   | SNV               | chr19 | 7935879   | FLJ22184      | synonymous SNV    | G   | A   |
|                  |                   |                   |                   |                   |                   |                   |                   |                    |                    |                    |                   |                   |                   | chr19 | 35843086  | FFAR1         | nonsynonymous SNV | G   | A   |
|                  |                   |                   |                   |                   |                   |                   |                   |                    |                    |                    |                   |                   |                   | chr19 | 40392347  | FCGBP         | nonsynonymous SNV | C   | G   |
|                  |                   |                   |                   |                   |                   |                   |                   |                    |                    |                    | SNV               |                   | SNV               | chr19 | 40392360  | FCGBP         | nonsynonymous SNV | G   | A   |
|                  |                   |                   |                   |                   | SNV               |                   |                   |                    |                    |                    |                   |                   |                   | chr19 | 27251     | KIR2DL2       | nonsynonymous SNV | C   | T   |
|                  | SNV               |                   |                   |                   |                   |                   |                   |                    |                    |                    |                   |                   |                   | chrX  | 114425196 | RBMXL3        | nonsynonymous SNV | G   | A   |
|                  | SNV               |                   |                   |                   |                   |                   |                   |                    |                    |                    |                   |                   |                   | chrX  | 114425210 | RBMXL3        | synonymous SNV    | G   | A   |
|                  |                   |                   |                   |                   |                   |                   |                   |                    |                    |                    |                   |                   |                   | chrX  | 118603830 | SLC25A5       | synonymous SNV    | A   | G   |
|                  |                   |                   |                   |                   |                   |                   |                   |                    |                    |                    |                   |                   |                   | chrX  | 118603844 | SLC25A5       | nonsynonymous SNV | T   | G   |

9 7 1 0 8 9 5 3 12 17 6 8 4 6

Total No. of detected SNVs per each clone.

**Table S5. Indels detected by the exome sequencing, Related to Figure 5C.**

| UM <sup>H1</sup> | UM <sup>D10</sup> | UM <sup>D11</sup> | ES <sup>H19</sup> | ES <sup>H29</sup> | IF <sup>H13</sup> | IF <sup>H30</sup> | IF <sup>D28</sup> | TKI <sup>H15</sup> | TKI <sup>H17</sup> | TKI <sup>E27</sup> | CKI <sup>C2</sup> | CKI <sup>C4</sup> | CKI <sup>C6</sup> | chr   | start    | ref   | alt          | Gene         | Comment       |
|------------------|-------------------|-------------------|-------------------|-------------------|-------------------|-------------------|-------------------|--------------------|--------------------|--------------------|-------------------|-------------------|-------------------|-------|----------|-------|--------------|--------------|---------------|
|                  |                   |                   |                   | Indel             |                   |                   |                   |                    | Indel              |                    |                   | Indel             |                   | chr12 | 7045891  | -     | CAGCAGCAG    | <i>ATN1</i>  | Triple repeat |
|                  |                   |                   |                   |                   |                   | Indel             |                   |                    |                    |                    |                   |                   |                   | chr12 | 7045891  | -     | CAGCAGCAGCAG | <i>ATN1</i>  | Triple repeat |
|                  |                   |                   |                   |                   |                   |                   |                   |                    |                    |                    |                   |                   | Indel             | chr19 | 36002421 | -     | CTGCTGCCA    | <i>DMKN</i>  | Triple repeat |
|                  |                   |                   |                   |                   |                   |                   |                   |                    |                    |                    |                   | Indel             | Indel             | chr19 | 36002421 | -     | CTGCTGCTG    | <i>DMKN</i>  | Triple repeat |
|                  |                   |                   |                   |                   |                   |                   |                   |                    |                    |                    | Indel             | Indel             |                   | chr20 | 60891763 | C     | -            | <i>LAMA5</i> |               |
|                  |                   | Indel             | Indel             |                   | Indel             | Indel             |                   |                    | Indel              | Indel              | Indel             |                   |                   | chr22 | 29885581 | 24 bp | -            | <i>NEFH</i>  |               |
|                  |                   |                   |                   |                   |                   |                   |                   |                    |                    |                    | Indel             | Indel             |                   | chr22 | 41573513 | AG    | -            | <i>EP300</i> |               |
|                  |                   |                   |                   |                   | Indel             | Indel             | Indel             |                    |                    |                    |                   |                   |                   | chrX  | 31986615 | -     | T            | <i>DMD</i>   | On-target     |
|                  |                   |                   | Indel             | Indel             |                   |                   |                   |                    |                    |                    |                   |                   |                   | chrX  | 31986615 | 18 bp | -            | <i>DMD</i>   | On-target     |

Total No. of detected Indels per clone.

24 bp: AGGCCAAGTCCCCAGAGAAGGAAG  
 18 bp: ATGCCATCCTGGAGTCC

**Table S6. List of primers used, Related to the Experimental Procedures.**

| Targets                                  | Primers                   | Sequence                                                                                        |
|------------------------------------------|---------------------------|-------------------------------------------------------------------------------------------------|
| qRT-PCR for pluripotency markers         | hACTB-Fwd                 | CCAACCGCGAGAAGATGA                                                                              |
|                                          | hACTB-Rev                 | CCAGAGGCGTACAGGGATAG                                                                            |
|                                          | hOCT3/4-Fw                | GACAGGGGGAGGGGAGGAGCTAGG                                                                        |
|                                          | hOCT3/4-Rv                | CTCCCTCCAACCAGTTGCCCAAAC                                                                        |
|                                          | hNANOG-Fw                 | TGAACCTCAGCTACAAACAG                                                                            |
|                                          | hNANOG-Rv                 | TGGTGGTAGGAAGAGTAAAG                                                                            |
| Construction of sgRNAs                   | DMD-sgRNA1-fwd            | GAGACCACTTGGATCCGggtatcttacaggaactccGTTTTAGAGCTAGAAATAGCA                                       |
|                                          | DMD-sgRNA2-fwd            | GAGACCACTTGGATCCGtcttacaggaactccaggaGTTTTAGAGCTAGAAATAGCA                                       |
|                                          | DMD-sgRNA3-fwd            | GAGACCACTTGGATCCGaggaactccaggatggcatGTTTTAGAGCTAGAAATAGCA                                       |
|                                          | DMD-sgRNA4-fwd            | GAGACCACTTGGATCCGCCAGGATGGCATTGGGCAGGTTTTAGAGCTAGAAATAGCA                                       |
|                                          | DMD-sgRNA5-fwd            | GAGACCACTTGGATCCGTTCTGTAAAGATACCAAAAAGTTTTAGAGCTAGAAATAGCA                                      |
|                                          | sgRNA-Universal-rev       | GCCCGGGTTTGAATTCAAAAAAGCACCGACTCGGTGCCACTTTTTCAAGTTGATAACGGACTAGCCTTATTTTAACCTTGCTATTCTAGCTCTAA |
| Construction of Donor template           | DMD-Donor-F1_FW           | ACCGCGGTGGCGGCCGCTTGCTATTGTGTCAAGG                                                              |
|                                          | DMD-Donor- F1_RV_2        | GCTCGCCGGCAAAAACAAAATGAAGCC                                                                     |
|                                          | DMD-Donor-F2_FW_2         | GTTTTGCCGGCGAGCTCAGACGATAA                                                                      |
|                                          | DMD-Donor-F2_RV_2         | GTAAAACATCGCGCAACGCAATTAGT                                                                      |
|                                          | DMD-Donor-F3_FW_2         | TGCGCGATGTTTTACATAATCCATCTATTTT                                                                 |
|                                          | DMD-Donor-F3_RV           | GGAGTTCCTTAAGATAACCATTTGTATTTAG                                                                 |
|                                          | DMD-Donor-F4_FW_2         | GCCAGACCGTCGTGAGAACATTGAATGCAACTGG                                                              |
|                                          | DMD-Donor-F4_RV           | CGGTACCCGGGGATCCAAGAGCTTGGCAAAAAGAAC                                                            |
| Sanger sequencing for dystrophin exon 45 | DMD-screening-fwd         | CACCTCTCGTATCCACGATCACTAAG                                                                      |
|                                          | DMD-screening-rev         | TAGTGCCTTTCACCTTGCTTAT                                                                          |
| Deep sequencing for dystrophin exon 45   | DMD-MiSeq-Rd1-fwd-X       | CTCTTTCCCTACACGACGCTCTTCCGATCTXXXXAATAAAAAGACATGGGGCTTCA                                        |
|                                          | DMD-MiSeq-Rd2-rev-X       | CTGGAGTTCAGACGTGTGCTCTTCCGATCTXXXXCTGGCATCTGTTTTTGAGGA                                          |
|                                          | Multiplex P5 fwd          | AATGATACGGCGACCACCGAGATCTACACTCTTTCCCTACACGACGCTC                                               |
|                                          | Multiplex P7 rev          | CAAGCAGAAGACGGCATAACGAGATGTGACTGGAGTTCAGACGTGTGCTC                                              |
| qPCR for residual episomal vectors       | hFbx15-2F                 | GCCAGGAGGTCTTCGCTGTA                                                                            |
|                                          | hFbx15-2R                 | AATGCACGGCTAGGGTCAA                                                                             |
|                                          | EBNA-183F                 | ATCAGGGCCAAGACATAGAGATG                                                                         |
|                                          | EBNA-243R                 | GCCAATGCAACTTGGACGTT                                                                            |
| Screening knockin clones                 | P1                        | AGCTTTACCTCAGTCTCAGAAAACA                                                                       |
|                                          | P2                        | ACCCGTTGCAAAAAGAACGTT                                                                           |
|                                          | P3                        | AGAATTGGGAACATGCTAAATACAA                                                                       |
|                                          | P4                        | TTGGATTAGATTGAGCCTAGTTCAG                                                                       |
|                                          | DMD-In45-F                | CCCATGATTGCTTAAAGGTGA                                                                           |
|                                          | DMD-In45-R                | AGAGCTTGGCAAAAAGAACGA                                                                           |
| Off-target analysis                      | gRNA-DMD1-OT1Fwd          | TATATGGAAGCGTGGTCTGTGATAATT                                                                     |
|                                          | gRNA-DMD1-OT1Rev          | TCCCTTTTATCAGCTAGGGCTCTTA                                                                       |
|                                          | gRNA-DMD1-OT2Fwd          | GTCCAAGAACCAGGCCAGAACTCAG                                                                       |
|                                          | gRNA-DMD1-OT2Rev          | CCATCCATCCCCAATAAAGCAAGGC                                                                       |
|                                          | gRNA-DMD1-OT3Fwd          | AAAATGTTGAGAATTGCCTATTTGA                                                                       |
|                                          | gRNA-DMD1-OT3Rev          | GATTCCTGCCAATTCTCTTTACACA                                                                       |
|                                          | gRNA-DMD1-OT4Fwd          | CCTCCTCTCTTTTGTGTATCTTCTCT                                                                      |
|                                          | gRNA-DMD1-OT4Rev          | TTTCCATTTCAAAAACCATTAACCTC                                                                      |
|                                          | gRNA-DMD1-OT5Fwd          | AGGGCTGATTATATTAGGAGAGTGG                                                                       |
| gRNA-DMD1-OT5Rev                         | AAAAATTTCCCATCTAGGAAGTGAG |                                                                                                 |
| cDNA analysis for dystrophin expression  | exon 43                   | ACAAAGCTCAGGTCGGATTG                                                                            |
|                                          | exon 46                   | AGTTGCTGCTCTTTTCCAGGT                                                                           |

# Supplemental Experimental Procedures

## DNA construction

The expression plasmids of Golden-TALENs shown in Figure S2A were constructed using the Golden-Gate cloning method as described previously (Sakuma et al., 2013a). Platinum-TALEN expression plasmids were constructed using the Platinum-Gate system with non-RVD (repeat variable di-residue) variations (Sakuma et al., 2013b).

The Cas9 cDNA sequence (SphcCas9) from *Streptococcus pyogenes* was codon-optimized for human codon usage bias, and possible *cis*-acting motifs (i.e. splicing sites, poly A sites and destabilizing motifs) were removed by DNA synthesis (GenScript). The synthesized SphcCas9 cDNA was cloned into pHL-EF1 $\alpha$ -GW-iP-A (Addgene 60599) by the Gateway LR reaction to construct the pHL-EF1 $\alpha$ -SphcCas9-iP vector, which contained an EF1 $\alpha$  promoter for high expression in human iPS cells. To construct custom sgRNA expression vectors, two oligos containing the sgRNA target site and a universal reverse primer (Table S6) were PCR amplified and cloned into the BamHI-EcoRI site of the pHL-H1-ccdB-mEF1 $\alpha$ -RiH vector (Addgene 60601), which used the H1 promoter to drive sgRNA. The resultant sgRNA expression vectors pHL-H1-sgRNA[DMD1~3]-mEF1 $\alpha$ -RiH are available from Addgene (ID 60602-60604).

The target region that contained all TALEN pairs and sgRNAs was cloned into the SSA vector, in which the target region was flanked by the truncated luciferase gene with a homologous region (Sakuma et al., 2013a). A donor template vector for exon 44 knockin of the dystrophin gene (pENTR-DMD-Donor, Addgene 60605) was constructed by conjugating the following four fragments: two homology arms (1 kbp for 3' and 0.9 kbp for 5' arm), an EF1 $\alpha$ -hygromycin cassette, and exon 44 fragments, all of which were combined using the In-Fusion HD Cloning Kit (Clontech).

The oligos and primers used are listed in Table S6. For electroporation experiments, plasmid DNAs were purified by a NucleoBond Xtra Maxi Endotoxin-free plasmid DNA purification Kit (TaKaRa) and were prepared as high concentration stock solution of at least 4  $\mu\text{g } \mu\text{l}^{-1}$ .

## **Cell culture**

HEK293T (human embryonic kidney 293T) cells were cultured in Dulbecco's modified Eagle's medium (DMEM) supplemented with 5% FBS (fetal bovine serum), 1× non-essential amino acids (NEAA), 100 units ml<sup>-1</sup> penicillin and 100 µg ml<sup>-1</sup> streptomycin. Human iPS cells were cultured on mitomycin-C-treated SNL feeder layers in Knockout SR Media {DMEM/F12 media supplemented with 20% Knockout SR, L-glutamine, NEAA, 2-mercaptoethanol, penicillin and streptomycin (Life Technologies), and 8 ng ml<sup>-1</sup> human basic FGF (Wako)}. SNLs were maintained in DMEM containing 6% FBS, 100 units ml<sup>-1</sup> penicillin, 100 µg ml<sup>-1</sup> streptomycin and 2mM GlutaMax. SNL-PH feeder cells (resistant to neomycin, puromycin, and hygromycin) were used for drug selection experiments.

## **Flow Cytometry**

iPS cells were first treated with CTK solution to remove feeder cells, and then single cells were isolated by treatment with 0.25% trypsin-EDTA. Cells were stained with the following antibodies in FACS buffer (5% FBS in PBS) for 20 min at room temperature. The antibodies used were Alexa Fluor 488-conjugated TRA-1-60 (1:20, BD Pharmingen, Cat No. 560174) and FITC-conjugated SSEA-5 (1:20, BioLegend, Cat No. 355207). Unstained cells were used as a negative control.

## **Quantitative RT-PCR**

mRNA was extracted from cells using TRIzol (Invitrogen) reagent and purified by chloroform extraction and isopropanol precipitation. After DNase treatment, the purified RNA was eluted in RNase-Free water and reverse-transcribed using ReverTra Ace (TOYOBO) with random primers and oligo-dT. To quantify the expression of *OCT3/4* and *NANOG*, the level of synthesized cDNAs was measured in isolated samples using SYBA Green (Invitrogen) with the appropriate primers shown in Table S6.

## **Teratoma formation assay**

All mouse experiments were carried out according to protocols approved by the Animal Research Committee of Kyoto University (No. KEI47). For teratoma formation,

sub-confluent human iPS cells were harvested and re-suspended in a 1:2 mixture of culture medium and Matrigel (BD) with 10  $\mu$ M Y-27632. Around  $2 \times 10^6$  human iPS cells were injected into the tibialis anterior muscles of NOD/SCID/DMD-null mice (NOD/SCID mice crossed with DMD-null mice (Tanaka et al., 2013)). The resulting tumors were harvested from mice 8-9 weeks after transplantation. Samples were fixed in 4% formaldehyde and embedded in paraffin. The sections were stained with hematoxylin and eosin.

### **Southern blot analysis**

Genomic DNA was isolated by phenol-chloroform extraction and ethanol precipitation. Genomic DNAs (15  $\mu$ g each) were digested with EcoRI for 16 hours, applied on 0.8% agarose gels, and then transferred onto nylon membranes with 20x SSC. The DNA probe (intron 45, 519 bp) was DIG-labeled with the DIG Easy Hyb Kit (Roche) using the pENTR-DMD-Donor as a template with DMD-In45-F and DMD-In45-R primers. DNA hybridization and signal detection were carried out using DIG Easy Hyb and the DIG Chemiluminescent Detection System (ImageQuant LAS 4000 system (GE)).

### **T7 endonuclease I assay**

The target region of TALEN and CRISPR was amplified by a high-fidelity PCR reaction from genomic DNA and purified by Wizard SV Gel and the PCR Clean up System (Promega). The primer sequences for PCR are shown in Table S6. Purified PCR products (400 ng) were denatured (95  $^{\circ}$ C for 5 min) and re-annealed (gradually cooled from 95  $^{\circ}$ C to 85  $^{\circ}$ C at  $-2 \text{ }^{\circ}\text{C sec}^{-1}$  and 85  $^{\circ}$ C to 25  $^{\circ}$ C at  $-0.1 \text{ }^{\circ}\text{C sec}^{-1}$ ) in NEBuffer 2 (NEB) using a thermocycler. The re-annealed PCR product was digested by 10 units of T7 endonuclease I (T7EI, NEB) for 15 min at 37  $^{\circ}$ C. The reaction was stopped by the addition of 0.25 M EDTA solution, and the sample was placed on ice. The PCR products were analyzed on 2% agarose gel to semi-quantify the intensity of the digested and undigested bands by ImageJ software.

### **Restriction enzyme sensitivity assay**

Purified PCR products (generated the same way as in the T7EI assay) were digested by restriction enzyme XcmI (NEB) with NEBuffer 2. The amounts of digested and



undigested PCR products were analyzed by 2% agarose gel electrophoresis. The rate of the area of nuclease-specific cleavage peaks in the sum of the area (expressed as a fraction cleaved) was used to estimate the gene editing levels using the following equation (Reyon et al., 2012).

$$\% \text{ mutation} = 100 \times (1 - (1 - \text{fraction cleaved})^{1/2})$$

### **Karyotype analysis**

Exponentially growing iPS cell samples (at passage 7 for the original DMD-iPSC clone and at passage 15-23 for the corrected clones) were arrested in metaphase by adding a final concentration of 0.04  $\mu\text{g ml}^{-1}$  KaryoMAX Colcemid Solution (Life technologies) into the culture medium for 3 h at 37 °C. Then, the cells were dissociated with 0.25% trypsin-EDTA solution and pelleted by centrifugation. The pelleted cells were subjected to hypotonic treatment with 0.075 M KCl solution for 30 min at 37 °C. After fixing the cells with fresh methanol/acetic acid (3:1) mixture, metaphase spreads were prepared on pre-cleaned glass slides by dropping a few drops of fixed cells from 1 cm height. Samples were then air dried. Conventional Giemsa staining was used for chromosomal counts and classifications, and the GTG (G-bands after trypsin and Giemsa) technique was used for G-banding. Slides were observed by AxioImagerZ2 microscopy (CarlZeiss) equipped with a CoolCube1m CCD camera (MetaSystems) and Ikaros software (MetaSystems). A total of 50 metaphases were counted for the chromosome counting, and 20 metaphases were observed for the G-band analysis per sample. The cells were described as abnormal if at least two nuclei were found to have the same chromosome aberration. Any samples suspected to be abnormal were further analyzed by multicolor fluorescent *in situ* hybridization (mFISH) analysis using the 24XCyte mFISH Probe Kit (MetaSystems) or by multicolor chromosome banding (mBAND) analysis using an appropriate XCyte 20 mBAND Probe Kit (MetaSystems) for chr20. Fluorescent images were acquired with Isis software (MetaSystems).

### **SNP array for the DNA copy number analysis**

Genomic DNA was isolated from iPS cell samples at passage 20-27 after feeder depletion by Matrigel culture and purified by the DNeasy Blood and Tissue Kit (QIAGEN). SNP genotyping was performed on Illumina HumanOmniExpress 12v1

following the manufacturer's protocol. PennCNV (Wang et al., 2007) software was used to detect CNVs using the following criteria: confidence score > 10, number of SNPs > 10 and minimum length of structural variant > 1 kb. Original CNVs (those called in the original DMD-fibroblasts and uncorrected DMD-iPSCs) and common CNVs (those detected in more than 7 subclones out of the 15 clones analyzed) were discarded. The fragmented CNVs were merged by the clean\_cnv.pl script using PennCNV software. We manually checked the values of Log R ratio and B allele frequency at the detected CNVs by IGV software. BEDTools was used to calculate the distance from the potential nuclease target sites to the edge of the detected CNVs and to select random positions in the genome.

### **Exome sequence analysis**

The same genomic DNA samples prepared above were used for exome capture with SeqCap EZ v3 (Roche) following the manufacturer's instructions with minor modification. Briefly, 1  $\mu$ g of genomic DNA was randomly fragmented by the Covaris E210 system. Adaptor-ligated genomic DNA libraries were prepared with the TruSeq DNA Sample Preparation Kit (Illumina) according to the manufacturer's instructions. The libraries were amplified by the ligation-mediated polymerase chain reaction (LM-PCR) and purified with AMPure XP beads (Agencourt). Human COT-1 DNA and Illumina adaptor-specific blocking oligonucleotides were used during hybridization to block repetitive genomic sequences and adaptor sequences, respectively. The exome-enriched libraries were amplified by LM-PCR, purified with the AMPure XP beads and quantified by a KAPA library quantification Kit (KAPA Biosystems). Ten pM of libraries were used in the cluster generation on HiSeq PE Flow Cell v3 (Illumina) using an Illumina cBot. Paired-end sequencing for  $2 \times 101$  cycles was performed using TruSeq SBS Kit v3 and HiSeq2500 (Illumina). CASAVA 1.8.2 (Illumina) was used to generate FASTQ files from the raw sequencing data.

The sequenced reads in the FASTQ files were mapped to the reference human genome (hg19) by BWA 0.6.2, and identical reads (i.e. PCR duplicates) were removed by Picard 1.68. All samples were generated within 92-120 million reads and had mapping rates over 92% (Table S3). Local re-alignment at the detected indel site was performed by the Genome Analysis Toolkit (GATK) v1.6. Base quality scores were recalibrated with GATK TableRecalibration script. SNVs and indels were called with

GATK UnifiedGenotyper according to the Broad Institute's best-practice v3 guidelines.

The number of nucleotides with a count greater than 30× coverage in the founder cells and iPS clones were subjected to SNV calling using SAMtool mpileup v0.1.19. We discarded variants with lower coverage (< 20 reads in autosomal chromosomes or < 10 reads in sex chromosomes). We calculated the nucleotide composition ratio of each SNV to discriminate homozygous (if one base consisted of more than 77.7%) and heterozygous (if the base compositions of two respective bases were in the range of 22.2-66.6%) SNVs. For indel calling, we considered whether > 40% of sequence reads supported the same indels. We also excluded the common SNVs/indels seen in all samples and the original SNVs/indels derived from the original DMD fibroblasts or DMD-iPSCs. We used ANNOVAR (Wang et al., 2010) to annotate the detected SNVs using the RefSeq, Cosmic ver.65 (Forbes et al., 2011), HGMD (Stenson et al., 2003) and dbSNP ver.137 (Sherry et al., 2001) databases.

### **Immunocytochemistry**

Cell samples seeded on cover slips were fixed with chilled methanol for 15 min and blocked by Blocking One (Nacalai) for 30 min at 4 °C. Cells were then stained with the appropriate primary antibodies for 16 hours at 4 °C and then with secondary antibodies for 1 hour at room temperature. Coverslips were then washed and observed in 1x PBS by confocal microscopy (Zeiss LSM 710). The primary antibodies used were: NCL-DYS1 (1:20; clone Dy4/6D3, Leica), MHC (1:400; R&D systems), MYH (1:200; clone H-300, Santa Cruz Biotechnology) and  $\alpha$ -skeletal muscle actin (1:200; Acris Antibodies). The secondary antibodies used were Alexa fluor 488 goat-anti-mouse (1:500; Invitrogen) for dystrophin protein and Alexa fluor 546 goat-anti-rabbit (1:500; Invitrogen) for MHC or MYH. DAPI (4,6-diamidino-2-phenylindole; Invitrogen) was used for nuclear counterstaining.

### **Western blot analysis**

Cell samples were lysed with RIPA buffer (Thermo) supplemented with a protease inhibitor cocktail (Calbiotech). The total amount of protein was quantified by the Pierce BCA Protein Assay Kit (Thermo). Samples were then mixed with loading buffer and heated at 95 °C for 10 min. Approximately 40  $\mu$ g of protein samples per lane were separated on NuPAGE 3-8% Tris-Acetate Gel (Invitrogen) with NuPAGE®

Tris-Acetate SDS running buffer (Invitrogen) and transferred to nitrocellulose membranes using iBlot (Invitrogen) for 13 min. Then, membranes were blocked by Blocking One for 1 hour at room temperature. The primary antibodies used were anti-dystrophin (1:200, Abcam) and anti-MHC (1:400, R&D systems). The secondary antibodies used were anti-rabbit IgG HRP-linked antibody and anti-mouse IgG HRP-linked antibody (1:1000, Cell Signaling). The protein expression was detected using the ImageQuant LAS 4000 system (GE).

## Supplemental References

- Forbes, S., Bindal, N., Bamford, S., Cole, C., Kok, C., Beare, D., Jia, M., Shepherd, R., Leung, K., Menzies, A., *et al.* (2011). COSMIC: mining complete cancer genomes in the Catalogue of Somatic Mutations in Cancer. *Nucleic Acids Res* *39*, D945-950.
- Reyon, D., Tsai, S., Khayter, C., Foden, J., Sander, J., and Joung, J. (2012). FLASH assembly of TALENs for high-throughput genome editing. *Nat Biotechnol* *30*, 460-465.
- Sakuma, T., Hosoi, S., Woltjen, K., Suzuki, K., Kashiwagi, K., Wada, H., Ochiai, H., Miyamoto, T., Kawai, N., Sasakura, Y., *et al.* (2013a). Efficient TALEN construction and evaluation methods for human cell and animal applications. *Genes Cells* *18*, 315-326.
- Sakuma, T., Ochiai, H., Kaneko, T., Mashimo, T., Tokumasu, D., Sakane, Y., Suzuki, K., Miyamoto, T., Sakamoto, N., Matsuura, S., *et al.* (2013b). Repeating pattern of non-RVD variations in DNA-binding modules enhances TALEN activity. *Sci Rep* *3*, 3379.
- Sherry, S., Ward, M., Kholodov, M., Baker, J., Phan, L., Smigielski, E., and Sirotkin, K. (2001). dbSNP: the NCBI database of genetic variation. *Nucleic Acids Res* *29*, 308-311.
- Stenson, P., Ball, E., Mort, M., Phillips, A., Shiel, J., Thomas, N., Abeyasinghe, S., Krawczak, M., and Cooper, D. (2003). Human Gene Mutation Database (HGMD): 2003 update. *Hum Mutat* *21*, 577-581.

- Tanaka, A., Woltjen, K., Miyake, K., Hotta, A., Ikeya, M., Yamamoto, T., Nishino, T., Shoji, E., Sehara-Fujisawa, A., Manabe, Y., *et al.* (2013). Efficient and reproducible myogenic differentiation from human iPS cells: prospects for modeling Miyoshi Myopathy in vitro. *PLoS One* *8*, e61540.
- Wang, K., Li, M., Hadley, D., Liu, R., Glessner, J., Grant, S., Hakonarson, H., and Bucan, M. (2007). PennCNV: an integrated hidden Markov model designed for high-resolution copy number variation detection in whole-genome SNP genotyping data. *Genome Res* *17*, 1665-1674.
- Wang, K., Li, M., and Hakonarson, H. (2010). ANNOVAR: functional annotation of genetic variants from high-throughput sequencing data. *Nucleic Acids Res* *38*, e164.
